# Supplementary material
Source: MDPI journal article supplement (https://www.mdpi.com/2311-5637/8/10/532)
Supplement: s1 [file s1]

## Supplementary Materials for:

# **$\beta$ -Farnesene Production from Low-cost Glucose in Lignocellulosic Hydrolysate by Engineered *Yarrowia lipolytica***

**Table S1** Plasmids used in this work.

| Plasmids                   | Descriptions                                                                                                                                              | Source      |
|----------------------------|-----------------------------------------------------------------------------------------------------------------------------------------------------------|-------------|
| pRSF-HUH                   | hisG-P <sub>ura3</sub> -Ura3-T <sub>Ura3</sub> -hisG (HUH), Kana <sup>r</sup>                                                                             | Lab storage |
| pRSF-ku70-HUH              | HR donor to disrupt <i>ku70</i> locus                                                                                                                     | This work   |
| pRSF-ku80-Leu2-HUH         | HR donor to integrate P <sub>TEF<sub>in</sub></sub> -Leu2-T <sub>XPR2</sub> into ku80 locus                                                               | This work   |
| pRSF-intA1-aaBFS-HUH       | HR donor to integrate P <sub>TEF<sub>in</sub></sub> -aaBFS-T <sub>XPR2</sub> into intA1 locus                                                             | This work   |
| pRSF-intC1-ERG10-tHMGR-HUH | HR donor to integrate P <sub>TEF<sub>in</sub></sub> -ERG10-T <sub>ERG10</sub> and P <sub>TEF<sub>in</sub></sub> -tHMGR-T <sub>HMGR</sub> into intC1 locus | This work   |
| pRSF-intC2-ERG12-ERG13-HUH | HR donor to integrate P <sub>EXP1</sub> -ERG12-T <sub>ERG12</sub> and P <sub>EXP1</sub> -ERG13-T <sub>ERG13</sub> into intC2 locus                        | This work   |
| pRSF-intC3-IDI-ERG20-HUH   | HR donor to integrate P <sub>TEF<sub>in</sub></sub> -IDI-T <sub>IDI</sub> and P <sub>TEF<sub>in</sub></sub> -ERG20-T <sub>ERG20</sub> into intC3 locus    | This work   |
| pRSF-intE1-ERG8-ERG19-HUH  | HR donor to integrate P <sub>EXP1</sub> -ERG8-T <sub>EXP1</sub> and P <sub>EXP1</sub> -ERG19-T <sub>ERG19</sub> into intE1 locus                          | This work   |
| pRSF-aaBFS-cjBFS-HUH       | HR donor to integrate P <sub>TEF<sub>in</sub></sub> -cjBFS-T <sub>XPR2</sub> into aaBFS locus                                                             | This work   |
| pRSF-aaBFS-mcBFS-HUH       | HR donor to integrate P <sub>TEF<sub>in</sub></sub> -mcBFS-T <sub>XPR2</sub> into aaBFS locus                                                             | This work   |
| pRSF-intE2-ERG10-tHMGR-HUH | HR donor to integrate P <sub>TEF<sub>in</sub></sub> -ERG10-T <sub>ERG10</sub> and P <sub>TEF<sub>in</sub></sub> -tHMGR-T <sub>HMGR</sub> into intE2 locus | This work   |
| pRSF-intE3-ERG12-ERG13-HUH | HR donor to integrate P <sub>EXP1</sub> -ERG12-T <sub>ERG12</sub> and P <sub>EXP1</sub> -ERG13-T <sub>ERG13</sub> into intE3 locus                        | This work   |
| pRSF-intE4-IDI-ERG20-HUH   | HR donor to integrate P <sub>TEF<sub>in</sub></sub> -IDI-T <sub>IDI</sub> and P <sub>TEF<sub>in</sub></sub> -ERG20-T <sub>ERG20</sub> into intE4 locus    | This work   |
| pRSF-intF1-ERG8-ERG19-HUH  | HR donor to integrate P <sub>EXP1</sub> -ERG8-T <sub>EXP1</sub> and P <sub>EXP1</sub> -ERG19-T <sub>ERG19</sub> into intF1 locus                          | This work   |

|                                  |                                                                                                              |           |
|----------------------------------|--------------------------------------------------------------------------------------------------------------|-----------|
| pRSF-intF2-tHMGR-tHMGR-HUH       | HR donor to integrate $P_{TEF_{in}}-tHMGR-T_{HMGR}$ and $P_{TEF_{in}}-tHMGR-T_{HMGR}$ into intF2 locus       | This work |
| pRSF-intF2-nadhHMGR-nadhHMGR-HUH | HR donor to integrate $P_{TEF_{in}}-nadhHMGR-T_{XPR2}$ and $P_{TEF_{in}}-nadhHMGR-T_{XPR2}$ into intF2 locus | This work |
| pRSF-intF2-nadhHMGR-tHMGR-HUH    | HR donor to integrate $P_{TEF_{in}}-nadhHMGR-T_{XPR2}$ and $P_{TEF_{in}}-tHMGR-T_{HMGR}$ into intF2 locus    | This work |
| pRSF-intF3-aaBFS-HUH             | HR donor to integrate $P_{TEF_{in}}-aaBFS-T_{XPR2}$ into intF3 locus                                         | This work |
| pRSF-intF3-aaBFS-aaBFS-HUH       | HR donor to integrate $P_{TEF_{in}}-aaBFS-T_{XPR2}$ and $P_{TEF_{in}}-aaBFS-T_{XPR2}$ into intF3 locus       | This work |

**Table S2** Primers used in this work.

|                 |                                               |
|-----------------|-----------------------------------------------|
| ku70up-F        | CGCACTTAATTAACACTACACTACTTGTACCATTCTACCC      |
| ku70up-R        | ttttacaacTGGTTTCGTGTTTCGTGTTTCGTGTCG          |
| ku70-HUH-F      | ACACGAACCAgttgtaaacgacggccagtcgaac            |
| ku70-HUH-R      | GTACTTTTTGGTAGCCGTAGGTCTCGTACTGCTTGAC         |
| ku70dn-F        | CTACCAAAAAGTACTATGGGAAGTGACTAGGGAGGC          |
| ku70dn-R        | agacacAGTGAACGACCAAGACTAAAGGGTGG              |
| ku70-line-F     | CACTACACTACACTACTTGTACCATTCTACCC              |
| ku70-line-R     | AGTGAACGACCAAGACTAAAGGGTGGC                   |
| ku80up-F        | CGTTGCGCAGCAACCCACTGCCGCTCAACCC               |
| ku80up-R        | ccggtctctGCTCAAAGTCACTGGTATGGCAGTGTG          |
| ku80-Leu2-tef-F | CTTTGAGCagagaccgggttgccggcgctatttg            |
| ku80-Leu2-tef-R | gtttcgggttctcgcggttagtactgcaaaaagtgtg         |
| ku80-Leu2-F     | ctaaccgcaggaacccgaaactaagaagaccaagactgac      |
| ku80-Leu2-R     | gtttacaacGACACGGGCATCTCACTTGCATATG            |
| ku80-Leu2-HUH-F | CCGTGTCgttgtaaacgacggccagtcgaac               |
| ku80-Leu2-HUH-R | TGTATCCGTAGCCGTAGGTCTCGTACTGCTTGAC            |
| ku80down-F      | GGCTACGGATACATATTGGTGACAGTTACCGCAATC          |
| ku80down-R      | TCTCAAATGCCTGGATTCTGGATCCATTCCCTTTGGTGCTGCTTC |
| ku80-line-F     | AGCAACCCACTGCCGCTCAACC                        |
| ku80-line-R     | GATTCTGGATCCATTCCCTTTGGTGCTGCTTC              |

---

|                    |                                                     |
|--------------------|-----------------------------------------------------|
| intA1-aabfs-up-F   | CGTTGCGCgaatgcgtgcgatttattatcccaaaaatac             |
| intA1-aabfs-up-R   | CCCGGTCTCTgtcgcactcgccgatatggtttgatc                |
| intA1-aabfs-tef-F  | gcgacaAGAGACCGGGTTGGCGGCGTATTT                      |
| intA1-aabfs-tef-R  | GTGGACATTCTAGAGAATGATTCTTATACTCAGAAGGAAATG          |
| intA1-aabfs-F      | TTCTCTAGAATGTCCACCCTGCCCATCTCCTCTGTC                |
| intA1-aabfs-R      | AGGCTCGAGTTACACGACCATGGGGTGCACGAAGAAAG              |
| intA1-aabfs-xpr-F  | CTCGAGCCTGTCCCCACGTTGCCGGTCTTGC                     |
| intA1-aabfs-xpr-R  | cgttttacaacACGGGCATCTCACTTGCGTATGTATG               |
| intA1-aabfs-HUH-F  | AGATGCCCCGTgttgtaaaacgacggccagtcgaac                |
| intA1-aabfs-HUH-R  | ctagtggatGTAGCCGTAGGTCTCGTACTGCTTGAC                |
| intA1-aabfs-dn-F   | ACGGCTACatccactagtggcctgccatagcactattg              |
| intA1-aabfs-dn-R   | TCTCAAATGCCTGgatttaaatgcggccgcaatgcacgc             |
| intA1-aabfs-line-F | gaatgcgtgcgatttattatcccaaaaataccc                   |
| intA1-aabfs-line-R | gatttaaatgcggccgcaatgcac                            |
| intA1-cjbfs-tef-R  | ATGTCCTTTCTAGAGAATGATTCTTATACTCAGAAGGAAATG          |
| intA1-cjbfs-F      | AATCATTCTCTAGAAAGGACATGAGCATTCCACTTTTGGCG           |
| intA1-cjbfs-R      | GGGGACAGGCTCGAGTCAAATGGCAAGAGGCTCTGTCAACAGC<br>AGAG |
| intA1-cjbfs-xpr-F  | TGCCATTTGACTCGAGCCTGTCCCCACGTTGCCGGTCTTGC           |
| intA1-mc-bfs-tef-R | TATGGTGCTTCTAGAGAATGATTCTTATACTCAGAAGGAAATG         |
| intA1-mcbfs-F      | ATCATTCTCTAGAAGCACCATACCCGTCTCCTCTGTAAGTTTTTC       |
| intA1-mcbfs-R      | GGACAGGCTCGAGTCAAATAACCATGGGGTGCACAAAG              |
| intA1-mcbfs-xpr-F  | GTTATTTGACTCGAGCCTGTCCCCACGTTGCCGGTCTTGCCTC         |
| intC1-up-F         | CGTTGCGCttgctggccttttgcacatgttcttctg                |
| intC1-up-R         | TGCAGTACaaaatcataaataatagatgaatag                   |
| intC1-ERG10-tef-F  | gattttGTACTGCAAAAAGTGCTGGTCGGATG                    |
| intC1-ERG10-tef-R  | GACACAAATGCGCCGCCAACCCGGTCTCTGAGCCCCG               |
| intC1-ERG10-F      | GTCTCTGAGCCCGTCTACATTGTTTCTACTG                     |
| intC1-ERG10-R      | CGTGTCTGTCAGGCCGTGACGAATACGACTCTCG                  |
| intC1-ERG10-xpr-F  | CTGCAGGACACGGGCATCTCACTTGCAT                        |
| intC1-ERG10-xpr-R  | tcatagGTAGGATCCAACTACGGAACCTGTGTTG                  |
| intC1-tHMGR-F      | GGATCCTACctatgaccgtatgcaaatattcgaaccg               |
| intC1-tHMGR-R      | CTTTTTGCAGTACaccagctctgtaaggtggttgagaagc            |
| intC1-tHMGR-tef-F  | gactgggtGTACTGCAAAAAGTGCTGGTCGGATGACGTGG            |

---

---

|                   |                                                |
|-------------------|------------------------------------------------|
| intC1-tHMGR-tef-R | tacaacAGAGACCGGGTTGGCGGCGCATTTG                |
| intC1-tHMGR-HUH-F | CGGTCTCTgttgtaaacgacggccagtcgaac               |
| intC1-tHMGR-HUH-F | ggatctgaGTAGCCGTAGGTCTCGTACTGCTTGAC            |
| intC1-dn-F        | TACGGCTACtcagatccactagtgccctagtcgtg            |
| intC1-dn-R        | TCTCAAATGCCTGgaagtggggatttaaatgcggccgc         |
| intC1-line-F      | ttgctggcctttgctcacatgttc                       |
| intC1-line-R      | gaagtggggatttaaatgcggccgc                      |
| intC3-up-F        | GCGTTGCGCccttattcgactcactatagaagttcctatc       |
| intC3-up-R        | CTTTTTGCAGTACcgtatacgggcctctcctctgac           |
| intC1-IDI-tef-F   | gtatacgTACTGCAAAAAGTGCTGGTCGGATG               |
| intC1-IDI-tef-R   | GTAAGACGTCGTAGAGACCGGGTTGGCGGCGCATTTG          |
| intC1-IDI-F       | CGGTCTCTACGACGTCTTACAGCGACAAAATCAAGAG          |
| intC1-IDI-R       | ATGAATACAGTTGTATCTGGAGTCGAGACATGATG            |
| intC1-ERG20-F     | CAGATACAACGTGATTTCATTGTGGGCCGAAGTGAAGAGG       |
| intC1-ERG20-R     | CTTTTTGCAGTACTCCAAGGCGAAATTCGAAAGCGTGTTCC      |
| intC1-ERG20-tef-F | GCCTTGGAGTACTGCAAAAAGTGCTGGTCGGATGACGTG        |
| intC1-ERG20-HUH-R | cgacacgaacaatGTAGCCGTAGGTCTCGTACTGCTTGAC       |
| intC3-dn-F        | CGGCTACattgttcgtgtcgatccgtacgacg               |
| intC3-dn-R        | TCTCAAATGCCTGaaatgcggccgcgaatgcacgcgataatta    |
| intC3-line-F      | cgactcactatagaagttcctattctctagaaagtataggaacttc |
| intC3-line-R      | aatgcggccgcgaatgcacgcgataatta                  |
| intC2-up-F        | CATTAATTGCGTTGCGCggttctgataacgagtaatcgtaatcc   |
| intC2-up-R        | ggcgccaaactcctctagagaataggaacttctatagtgtg      |
| intC2-ERG12-exp-F | cctattcttagaaggagtttggcgcccggtttttcg           |
| intC2-ERG12-exp-R | AATGATGTAGTCCATgctgtagatatgtctgtgtgaagggggttg  |
| intC2-ERG12-F     | atatctacagcATGGACTACATCATTTTCGGCGCCAGG         |
| intC2-ERG12-R     | GAGCTCGGGAAGAATGGAGATGGGCCTATGACTCC            |
| intC2-ERG13-F     | ATTCTTCCCGAGCTCCACTTCTCGTGTTTTTCGTGTGCACAGATG  |
| intC2-ERG13-R     | ctacagcATGTCGCAACCCAGAACGTTGGAATCAAAG          |
| intC2-ERG13-exp-F | GGGGTTGCGACATgctgtagatatgtctgtgtgaagggggttg    |
| intC2-ERG13-exp-R | cgttttacaacaaggagtttggcgcccggtttttcg           |
| intC2-HUH-F       | ccaaactcctgttgtaaacgacggccagtcgaacc            |
| intC2-HUH-R       | gtatccgaggagttcGTAGCCGTAGGTCTCGTACTGCTTGAC     |
| intC2-dn-F        | CCTACGGCTACgaactcctcgatacctccgagtgtgcagc       |

---

---

|                   |                                                            |
|-------------------|------------------------------------------------------------|
| intC2-dn-R        | TCTCAAATGCCTGgCGaatgcacgcgatgattgaaacgcctg                 |
| intC2-line-F      | ggttctgataacgagtaatcgtaatccgcaaataac                       |
| intC2-line-R      | gcgaatgcacgcgatgattgaaacgcctg                              |
| intE1-up-F        | TTAATTGCGTTGCGCtaacaatgataaaccaaggccattgattgagac           |
| intE1-up-R        | aaactccttgcatgtccaagtacaataactaaacatactgtac                |
| intE1-ERG8-exp-F  | tggacaatgcaaggagtgttgccgccccgtttttcgagccc                  |
| intE1-ERG8-exp-R  | CGAATAGGTGGTCATgctgtagatatgtcttgtgtgtaagggggttg            |
| intE1-ERG8-F      | atctacagcATGACCACCTATTCGGCTCCGGGAAAGGC                     |
| intE1-ERG8-R      | GCACTTGGACTIONGAGCCATTACAGACGCGGAAAAG                      |
| intE1-ERG19-F     | CTCGAGTCCAAGTGCGAGATCCAGGACCGAGCGTTTG                      |
| intE1-ERG19-R     | tacagcATGATCCACCAGGCCTCCACCACCGCTCCGGTGAAC                 |
| intE1-ERG19-exp-F | CCTGGTGGATCATgctgtagatatgtcttgtgtgtaagggggttg              |
| intE1-ERG19-exp-R | ttttacaacccccacagctttcggtgagtatgagcggcggcagattcgagcgtttcc  |
| intE1-HUH-F       | acgtgtgggggttgtaaaacgacggccagtcgaac                        |
| intE1-HUH-R       | tatgctgtgcagcctGTAGCCGTAGGTCTCGTACTGCTTGAC                 |
| intE1-dn-F        | CCTACGGCTACagcgtcgacaagcatacagccctcg                       |
| intE1-dn-R        | TCTCAAATGCCTGgaatgcacgcgatgttagaagcaattgga                 |
| intE1-line-F      | taacaatgataaaccaaggccattgattgagac                          |
| intE1-line-R      | gaatgcacgcgatgttagaagcaattggag                             |
| intE2-up-F        | CGTTGCGCttcagtcgataccatggccgcaactttcttg                    |
| intE2-up-R        | ACTTTTTGCAGTACcagggatatacgagctacgtggtggtgc                 |
| intE2-dn-F        | CCTACGGCTACgtgtggattgcgatattgaagtgttgactcg                 |
| intE2-dn-R        | TCTCAAATGCCTGgcgatgaaatacgccagggtttagactatacc              |
| intE2-line-F      | cagtcgataccatggccgcaacttc                                  |
| intE2-line-R      | gcgatgaaatacgccagggtttagactatacc                           |
| intE3-up-F        | CTTACATTAATTGCGTTGCGCtaagcggcttctatccatggtttactg           |
| intE3-up-R        | ggcgccaaactccttgattccgaacagaaggaatgcacgcgac                |
| intE3-dn-F        | TACGAGACCTACGGCTACctgaactgtataccaatgtactgtacgcctgaac       |
| intE3-dn-R        | TCTCAAATGCCTGtgaaggaaatgcctaaacctaattgaacgaagcg            |
| intE3-line-F      | cggcttctatccatggtttactgaggagaaatgttc                       |
| intE3-line-R      | tgaaggaaatgcctaaacctaattgaacgaagcg                         |
| intE4-up-F        | AATTGCGTTGCGCgccccctggcggttctgataacgagtaat                 |
| intE4-up-R        | GCACTTTTTGCAGTACaatgaagtgaagttcctatactttctagagaataggaactct |
| intE4-dn-F        | AGACCTACGGCTACgatagggaacaccgcggaacagggaacac                |

---

---

|                    |                                                 |
|--------------------|-------------------------------------------------|
| intE4-dn-R         | TCTCAAATGCCTGcacgcgatttaacactggaccgtactgccc     |
| intE4-line-F       | ctgggcggttctgataacgagtaatcg                     |
| intE4-line-R       | cacgcgatttaacactggaccgtactgccc                  |
| intF1-up-F         | CATTAATTGCGTTGCGCacacacaagtttcagacttgctcctttg   |
| intF1-up-R         | ccaaactccttatttatgcccttactcgtacagtgtgcaatactgc  |
| intF1-dn-F         | GAGACCTACGGCTACgtggcctttctggggaccgagaattagtg    |
| intF1-dn-R         | TCTCAAATGCCTGggattttaatgcggccgcaatgcac          |
| IntF1-line-F       | caagtttcagacttgctccttttgagtcttc                 |
| intF1-line-R       | ggattttaatgcggccgcaatgcac                       |
| intF2-up-F         | CATTAATTGCGTTGCGCgaggaaagtggttacagtatgtacatac   |
| intF2-up-R         | TGCAGTACtctcgggtgggtgattcggtagagctttcggtctttgg  |
| intF2-1-tef-F      | ccgaggaGTACTGCAAAAAGTGCTGGTCGGATGACGT           |
| intF2-1-tef-R      | cagactgggtAGAGACCGGGTTGGCGGCGCATTTG             |
| intF2-1-thmgr-F    | CCCGGTCTCTAcccagtcgtgaagtggttgagaagcacgttc      |
| intF2-1-thmgr-R    | catagGTAGctatgaccgtatgcaaatttcgaaccgtttt        |
| intF2-2-thmgr-F    | catagCTACctatgaccgtatgcaaatttcgaaccgtttt        |
| intF2-2-HUH-F      | actggccgctgttttacaacAGAGACCGGGTTGGCGGCGCATTTGTG |
| intF2-2-HUH-R      | taattgagaaggccactGTAGCCGTAGGTCTCGTACTGCTTGAC    |
| intF2-dn-F         | ACCTACGGCTACagtggccttctcaattaaaataaac           |
| intF2-dn-R         | TCTCAAATGCCTGgcacgcgatttccctgattactatgatatttc   |
| IntF2-line-F       | ggtacagtatgtacatactgtgaaggtgcaca                |
| intF2-line-R       | gcacgcgatttccctgattactatgatatttc                |
| intF2-nadh-tef-R   | GCCAGTCTTGCCGGTAGAGACCGGGTTGGCGGCGCATTTGTG      |
| intF2-nadh-thmgr-F | ACCCGGTCTCTACCGGCAAGACTGGCCACATCGACGGACTG       |
| intF2-nadh-thmgr-R | CGTAGTTGGATCTTAAGTGTTCTCCAGCACTTGTTTAGCTCTA     |
| intF2-nadh-xpr-F   | GAGAACACTTAAGATCCAACACTACGGAACCTTGTGTTGATG      |
| intF2-nadh-xpr-R   | cggtcatagGTAGGACACGGGCATCTCACTTGCAT             |
| intF2-2nsdh-xpr-R  | AAGTGAGATGCCCCGTGTCAGGACACGGGCATCTCACTTGCAT     |
| intF2-2nsdh-xpr-F  | AGATGCCCCGTGTCCTGACACGGGCATCTCACTTGCATAT        |
| intF3-up-F         | TAATTGCGTTGCGCctgaagacaaggccgacgatgatgagc       |
| intF3-up-R         | GAGTGAATTGgagggttgacgtatagcaggttgatggtgat       |
| intF3-1-tef-F      | cgtaaccctcCAATTCACCTCACTCTCCCGACTATCCAACaacg    |
| intF3-2-tef-R      | aagacactgcggAGAGACCGGGTTGGCGGCGTATTTG           |
| intF3-2-HUH-F      | cgcagtgtcttgctctctggatctccagtggatgaacg          |

---

|               |                                                |
|---------------|------------------------------------------------|
| intF3-2-HUH-R | cagaatgcagcGTAGCCGTAGGTCTCGTACTGCTTGAC         |
| intF3-dn-F    | GGCTACgctgacattctgcgtctgtacatctgtc             |
| intF3-dn-R    | TCTCAAATGCCTGgaaaggcacagagatgcccttgagaggatcacg |
| IntF3-line-F  | ctgaagacaaggccgacgatgatgagc                    |
| intF3-line-R  | gaaaggcacagagatgcccttgagaggatcacg              |

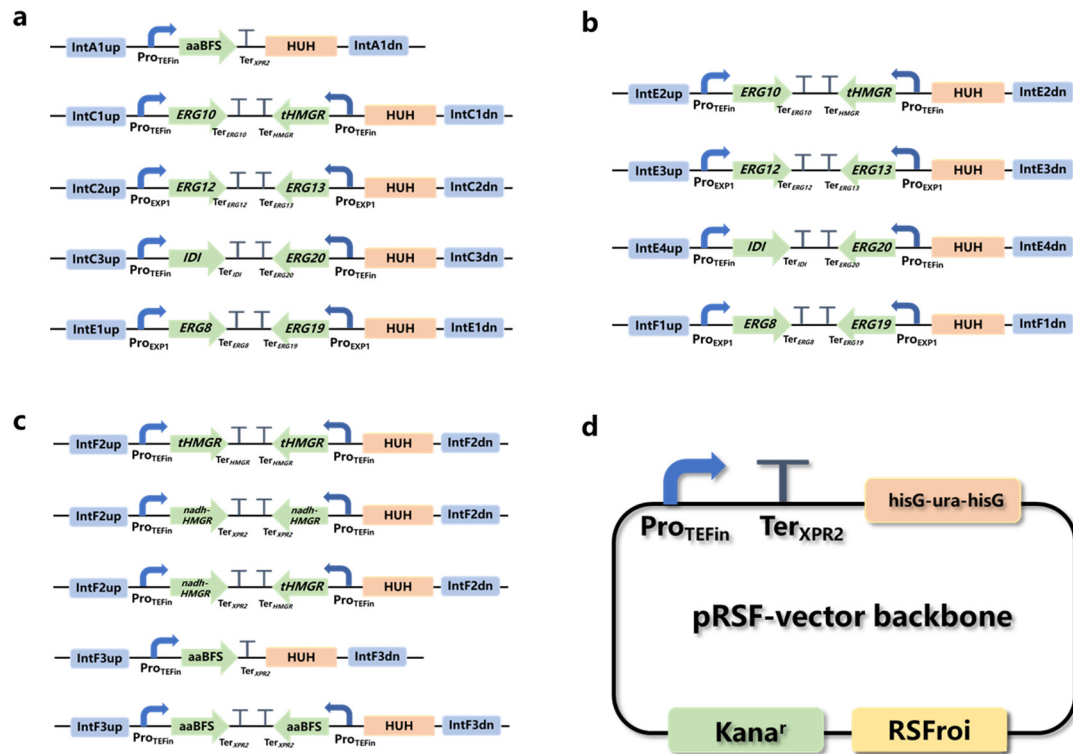

**Figure S1** (a-c) Schematic representation of gene chromosome integration in this study and (b) schematic representation of pRSF vector backbone. Blue rectangular boxes represent homologous arms, orange rectangular box represents the his-ura-his box, green arrow boxes represent genes, blue curved arrows represent promoters and the dark blue T represents terminators.

**Table S3** The exogenous DNA used in this study.

| Genes        | Sequence (codon optimized)                                                                                                                                                                                                                                                                                                |
|--------------|---------------------------------------------------------------------------------------------------------------------------------------------------------------------------------------------------------------------------------------------------------------------------------------------------------------------------|
| <i>aaBFS</i> | ATGTCCACCCTGCCCATCTCCTCTGTCTCCTCTTCCCTCTTCCACCTCCCC<br>ATTGTCGTGGACGACAAGGACTCTACCAAGCCCGACGTGATCCGACACA<br>CCACCACCTTCAACGCCTCTATTTGGGGTGACCAGTTCCTCACCTACGA<br>CGAGCCCAGGACCTGGTCATGAAGAAGCAGCTGGTGGAGGAGCTCAA<br>GGAAGAGGTCAAGAAGGAGCTGATCACCATTAAGGGCTCCAACGAGCC<br>CATGCAGCACGTCAAGCTGATCGAGCTCATTGACGCCGTGCAGCGACTC |

|              |                                                                                                                                                                                                                                                                                                                                                                                                                                                                                                                                                                                                                                                                                                                                                                                                                                                                                                                                                                                                                                                                                                                                                                                                                                                                                                                                                                                                                                                                                                                                                                                                                                                                        |
|--------------|------------------------------------------------------------------------------------------------------------------------------------------------------------------------------------------------------------------------------------------------------------------------------------------------------------------------------------------------------------------------------------------------------------------------------------------------------------------------------------------------------------------------------------------------------------------------------------------------------------------------------------------------------------------------------------------------------------------------------------------------------------------------------------------------------------------------------------------------------------------------------------------------------------------------------------------------------------------------------------------------------------------------------------------------------------------------------------------------------------------------------------------------------------------------------------------------------------------------------------------------------------------------------------------------------------------------------------------------------------------------------------------------------------------------------------------------------------------------------------------------------------------------------------------------------------------------------------------------------------------------------------------------------------------------|
|              | <p>GGTATCGCTTACCACTTCGAGGAAGAGATCGAGGAAGCCCTGCAGCAC<br/> ATTCACGTCACCTACGGAGAGCAGTGGGTGGACAAGGAGAACCTCCAG<br/> TCTATTTCCCTGTGGTTCCGACTGCTCCGACAGCAGGGTTTCAACGTCTC<br/> TTCCGGAGTGTTCAAGGACTTCATGGACGAGAAGGGAAAGTTCAAGGA<br/> GTCTCTGTGCAACGACGCCCAGGGCATCCTGGCTCTCTACGAGGCCGCT<br/> TTCATGCGAGTCGAGGACGAGACCATTCTGGACAACGCCCTGGAGTTCT<br/> CCAAGGTGCACCTCGACATCATTGCTAAGGACCCCTCTTGTGACTCTTCC<br/> CTGCGAACCCAGATTACCAAGGCTCTGAAGCAGCCTCTCCGACGACGA<br/> CTGGCTCGAATCGAGGCTCTGCACTACATGCCCATCTACCAGCAGGAGA<br/> CCTCCACGACGAGGTCCTGCTCAAGCTGGCTAAGCTCGACTTCTCCGT<br/> GCTCCAGTCTATGCACAAGAAGGAGCTGTCTCACATCTGCAAGTGGTG<br/> AAGGACCTGGACCTCCAGAACAAGCTCCCCCTTCGTCCGAGACCGAGTC<br/> GTGGAGGGATACTTCTGGATCCTGTCCATCTACTACGAGCCCCAGCACG<br/> CCCGAACCCGAATGTTCTCATGAAGTCTTGATGTGGCTGGTCGTGCTC<br/> GACGACACCTTCGACAACCTACGGCACCTACGAGGAGCTGGAGATCTTC<br/> ACCCAGGCTGTCGAGAAGTGGTCTATTTCTGTCTGGACATGCTCCCCG<br/> AGTACATGAAGCTGATCTACCAGGAGCTGGTCAACCTCCACGTGGAGAT<br/> GGAGGAGTCCCTGGAGAAGGAAGGCAAGGCCTACCAGATTCACTACGT<br/> GAAGGAGATGGCTAAGGAGCTCGTCCGAACTACCTGGTGGAGGCCCG<br/> ATGGCTCAAGGAAGGCTACATGCCACCCTGGAGGAGTACATGTCTGTC<br/> TCCATGGTGACCGGAACCTACGGCCTGATGACCGCTCGATCTTACGTCG<br/> GCCGAGGTGACATCGTGAACGAGGACACCTTCAAGTGGGTGTCTTCCTA<br/> CCCTCCCATCGTCAAGGCCTCCTGCGTGATCATTGCACTCATGGACGACA<br/> TTGTCTCTCACAAGGAAGAGCAGGAGCGAGGTCACGTGGCTTCTTCCAT<br/> TGAGTGCTACTCTAAGGAGTCCGGAGCCTCTGAGGAAGAGGCCTGTGA<br/> GTACATCTCCCGAAAGGTCGAGGACGCCTGGAAGGTCATCAACCGAGA<br/> GTCTCTCCGACCTACCGCTGTCCCTTTCCCTCTGCTCATGCCTGCCATCA<br/> ACCTCGCTCGAATGTGTGAGGTCTGTACTCCGTGAACGACGGCTTCAC<br/> CCACGCCGAGGGTGACATGAAGTCCTACATGAAGTCTTTCTTCGTGCAC<br/> CCCATGGTCGTGTAA</p> |
| <i>cjBFS</i> | <p>ATGAAGGACATGAGCATTCCACTTTTGGCGGCGGTGTCTTCATCCACGG<br/> AGGAGACTGTGCGACCCATTGCTGACTTCCATCCGACACTGTGGGGCAA<br/> CCACTTCTTGAAATCTGCTGCCGATGTGGAGACTATTGACGCCGCGACT<br/> CAGGAACAGCACGCCGCTCTCAAGCAGGAGGTGCGTCGCATGATCACC<br/> ACAACGGCCAACAAGCTGGCCCAAAAGCTCCACATGATTGATGCCGTTT<br/> AACGGTTAGGAGTGGCCTACCACTTTGAGAAGGAGATTGAGGACGAGC<br/> TGGGAAAGGTTTCCCATGATCTGGACTCTGACGATCTCTACGTGGTCTCC<br/> CTTCGGTTCAGACTATTCCGACAGCAGGGCGTTAAGATCAGTTGTGACG<br/> TCTTTGACAAGTTCAAGGATGATGAGGGTAAGTTCAAGGAAAGTCTGAT<br/> CAACGATATCAGAGGCATGCTGTCCCTTTATGAAGCAGCCTATTTGGCAA<br/> TCCGAGGAGAGGATATCCTGGACGAGGCTATTGTGTTTACAACCAACCA<br/> CCTGAAGTCTGTCATCTCCATTTCCGACCACTCGCATGCCAATTCCAACC<br/> TGGCTGAGCAGATCAGACACAGCTTGCAGATTCCTCTGCGAAAGGCCGC<br/> AGCCCGTCTGGAGGCTCGATACTTTTGGACATCTACTCGCGAGACGAC</p>                                                                                                                                                                                                                                                                                                                                                                                                                                                                                                                                                                                                                                                                                                                                                                                                                                                                    |



|              |                                                                                                                                                                                                                                                                                                                                                                                                                                                                                                                                                                                                                                                                                                                                                                                                                                                                                                                                                                                                                                                                                                                                                                                                                                                                                                                   |
|--------------|-------------------------------------------------------------------------------------------------------------------------------------------------------------------------------------------------------------------------------------------------------------------------------------------------------------------------------------------------------------------------------------------------------------------------------------------------------------------------------------------------------------------------------------------------------------------------------------------------------------------------------------------------------------------------------------------------------------------------------------------------------------------------------------------------------------------------------------------------------------------------------------------------------------------------------------------------------------------------------------------------------------------------------------------------------------------------------------------------------------------------------------------------------------------------------------------------------------------------------------------------------------------------------------------------------------------|
|              | <p>CTGCATGACGAAACTCTGCTCAAATTTGCCAAGCTTGATTTC AACATTCT<br/> GCAGGCTGCTCACCAGAAGGAGGCGTCCATCATGACCCGATGGTGGAA<br/> CGACCTCGGCTTCCCCAAGAAGGTTCCATATGCCAGAGACCGAATCATC<br/> GAGACCTACATCTGGATGCTTCTTGGTGTTCCTTACGAGCCCCAACCTCGC<br/> GTTTGGGCGAATCTTCGCTTCCAAGGTGGTGTGTATGATCACAACCATAG<br/> ATGACACTTTTGATGCATACGGTACCTTCGAGGAGCTCACTCTGTTCACT<br/> GAGGCCGTCACTAGGTGGGACATTGGTCTCATCGACACCCTGCCGGAGT<br/> ACATGAAATTCATTGTCAAGGCGCTGTTGGATATCTACCGAGAGGCCGA<br/> GGAAGAGCTCGCAAAGGAGGGCCGCTCGTACGGAATCCCCTACGCTAA<br/> ACAGATGATGCAGGAGCTGATTATCCTCTACTTCACCGAAGCCAAGTGG<br/> CTGTACAAGGGCTACGTTCTACTTTTGACGAGTATAAAAGCGTCGCACT<br/> ACGTTTCGATTGGCCTTCGAACCCTGGCCGTCGCTAGTTTTGTGCTAG<br/> GAGACTTTATTGCCACCAAGGACAACCTTCGAATGCATTCTCAAGAATGC<br/> TAAGTCGCTCAAGGCTACAGAAACCATTTGGACGGCTCATGGACGACATT<br/> GCAGGTTACAAGTTTGAGCAGAAACGGGGCCACAACCCCTCTGCTGTC<br/> GAGTGCTACAAGAACCAGCATGGAGTATCTGAAGAAGAAGCCGTGAAA<br/> GAACTCTTACTGGAAGTCGCCAATTCGTGGAAGGACATTAACGAGGAGC<br/> TGCTCAACCCTACGACGGTACCTCTCCCCATGCTCCAACGACTTCTGTAT<br/> TTTGCTCGGTCAGGTCATTTTCATCTACGACGATGGTCACGACAGATACAC<br/> CCATTCTCTAATGATGAAGCGACAAGTGGCTCTGCTGTTGACAGAGCCT<br/> CTTGCCATTTGA</p>                                                                                                                                             |
| <i>mcBFS</i> | <p>ATGAGCACCATAACCCGTCTCCTCTGTAAGTTTTTCCTCGTCAAGCTCTCC<br/> GCTGGTCCCTTGATGACAAATTGAGTACCAAGCAGGACGTGGTGCGACAC<br/> ACCATGAACTTCTCGGCAAGCATTTGGGGAGACCAGTTTTTAACTTATCA<br/> TGAGCCAGAGGATCTGGTGATCAAGAAGCAACTCGTCGAGCAGCTCAA<br/> GGAGGAGGTTAAGAAGGAACTGATGACCATCAAGGGCTCCAACGAACC<br/> TATGCAGCATATCAAGCTTATGGAGCTGATTGATTCGGTCCAGAGACTGG<br/> GTATTGCCTACCACTTTGAGGAGGAAATCGAGGAGGCCCTCCAACACAT<br/> CCACGTCACGTACGGAGAGCAGTGGATCGACAAGGAGAACCTGCAATC<br/> TGTGTCTCTGTGGTTCCGACTGCTCAGACAGCAGGGGCTTCAACGTGTCT<br/> TCTGGTGTGTTCAAGGACTACACCGATGAGAAGGGGGACTTCAAAGAG<br/> TCGTTGTGCAACGACGCACACGGCATCCTGGCTCTCTATGAAGCTGCTT<br/> ACATGCGAGTTGAGGGCGAGACCACTTTGGACAAGGCGCTCGAGTTCA<br/> CCAAGGTGCATCTCGACATCATCAGTAAGGACCCCTCCTGTGACTCTTAT<br/> CTGCGAACGCGAGTCCACCAGGCTCTCAAACAACCTCTCCGCCGTCGG<br/> CTGGCAAGAATCGAAGCGCTGCACTACATGCCTGTCTACCAGCAAGACT<br/> CCTCGCATAATGAGGTTCTGTAAAGCTGGCCAAACTTGATTCTCCGTC<br/> CTACAGTCCATGCACAAGACGGAGCTCAGCCACATTTGCAAGTGGTGG<br/> AGGATCTCGATCTGCAGAACAAAGCTCCCCTACGTGCGAGACAGAGTGGT<br/> CGAGGGCTACTTCTGGATTCTGTGATCTACTACGAGCCCCAGCGGGCC<br/> CGAACTCGAATGTTCTGATGAAGACTTGTATGTGGCTGGTCGTTCTGG<br/> ATGATACCTTTGACAACATATGGAACATATGAGGAATTGGAGATTTTGCC<br/> CAGGCCGTTGAGCGGTGGTCCATAAGTTGCATGGATATGCTGCCCGAGT<br/> ACATGAAGCTGATTTACCAGGAGCTTGTGAATCTGCATGTGGACATGGA</p> |

|                  |                                                                                                                                                                                                                                                                                                                                                                                                                                                                                                                                                                                                                                                                                                                                                                                                                                                                                                                                                                                                                                                                                                                                                                                                                                                                                                                                                                                                                                                                         |
|------------------|-------------------------------------------------------------------------------------------------------------------------------------------------------------------------------------------------------------------------------------------------------------------------------------------------------------------------------------------------------------------------------------------------------------------------------------------------------------------------------------------------------------------------------------------------------------------------------------------------------------------------------------------------------------------------------------------------------------------------------------------------------------------------------------------------------------------------------------------------------------------------------------------------------------------------------------------------------------------------------------------------------------------------------------------------------------------------------------------------------------------------------------------------------------------------------------------------------------------------------------------------------------------------------------------------------------------------------------------------------------------------------------------------------------------------------------------------------------------------|
|                  | AGAGTCCCTTGAGAAAGGTGGCAAGACTTATCAGATCCAGTACGTCAAG<br>GAAATGGCCAAGGAACCTCGTAAGGAACCTACTTGGTGGAGGCTCGATGG<br>CTCAAGGAGGGATATATGCCACACTAGAGGAGTACATGTCGGTTTCTAT<br>GGTGACGGGAACCTTACGGCTTGATGATTGCGCGGTTCGTACGTCGGTCGT<br>GACGACATTGTGACAGAGGACACCTTCAAGTGGGTAGTTCTTACCCTC<br>CCATCATTAAAGGCTTCATGTGTCATTGTGAGATTGATGGACGATATTGTT<br>CGCATCGTGAGGAACAGGAGCGAGGACACGTGGCTTCGTCTATTGAGT<br>GCTACTCCAAAGAAAGTGGTGCCACCGAAGAAGAAGCCTGTGAATACA<br>TCTCTTCCAAGGTCGAAGACGCTGGAAGGTAATCAACCGAGAGTCACT<br>TCGCCCCGACAGCCGTTCTTTTCTCTGCTTATGCCAGCTATTAATTTAGC<br>ACGAATGTGTGAGGTGCTGTACTCTGTCAACGATGGACTCACTCATGCC<br>GAGGGTGACATGAAGTCCTACATGAAAAGCTACTTTGTGCACCCCATGG<br>TTATTGA                                                                                                                                                                                                                                                                                                                                                                                                                                                                                                                                                                                                                                                                                                                                                                                                   |
| <i>nadh-HMHR</i> | ATGACCGGCAAGACTGGCCACATCGACGGACTGAATTCTCGAATCGAGA<br>AGATGCGAGACCTGGACCCCGCCCAAAGACTGGTGAGAGTGGCTGAAG<br>CTGCTGGCCTGGAACCTGAAGCTATCTCTGCTCTGGCTGGCAATGGAGC<br>TCTGCCCCCTGTCTCTTGCTAATGGCATGATTGAAAATGTGATCGGCAAGT<br>TCGAGCTGCCCCCTGGGCGTTGCTACTAACTTTACTGTGAATGGCAGAGA<br>TTACCTGATCCCCATGGCCGTGGAAGAGCCCTCTGTGGTTGCTGCTGCTT<br>CTTACATGGCCAGAATCGCCCGAGAGAACGGCGGCTTTACTGCCCATGG<br>AACTGCCCCCTCTGATGAGAGCTCAGATTCAAGTGGTGGGACTGGGCGAC<br>CCCGAAGGAGCTAGACAAAGACTGCTGGCTCACAAAGCCGCCTTTATG<br>GAAGCCGCCGATGCTGTGGATCCTGTGCTGGTTGGACTGGGAGGAGGAT<br>GTAGAGATATTGAGGTGCACGTGTTTCGAGACACCCCGTGGGAGCTAT<br>GGTGGTGCTGCATCTTATTGTGGACGTGCGAGACGCCATGGGCGCTAAT<br>ACTGTGAATACCATGGCCGAGCGACTGGCCCCCGAAGTGGAAACGAATTG<br>CTGGCGGAACCTGTGCGACTGCGAATTCTGTCTAATCTGGCCGACCTGCG<br>ACTGGTGCGAGCCAGAGTGGAATTAGCTCCTGAAACCCTGACTACTCAG<br>GGCTATGACGGAGCTGACGTGGCTCGAGGAATGGTGGAAAGCTTGTGCC<br>CTGGCTATTGTGGACCCCTATAGAGCCGCCACTCATAACAAGGGAATCAT<br>GAACGGCATCGACCCCGTGGTGGTGGCCACTGGAAACGATTGGAGAGC<br>TATTGAGGCCGGAGCTCACGCCTATGCCGCTAGAAGTGGACACTATACTT<br>CTCTGACCCGATGGGAGCTGGCCAACGACGGCAGACTGGTGGGAACATA<br>TTGAGCTGCCCCCTGGCTCTGGGACTGGTGGGAGGAGCTACTAAAACCTCA<br>CCCTACCGCCCCGAGCCGCCCTGGCTCTGATGCAAGTGGAAACCGCTACT<br>GAGCTGGCCCAAGTGAAGTGGCGCTGTGGGACTGGCTCAAAATATGGCCG<br>CTATCCGAGCCCTGGCTACCGAGGGAATTCAGAGAGGCCATATGACTCT<br>GCACGCCCGAAATATTGCCATCATGGCCGGCGCTACTGGCGCCGATATTG<br>ATAGAGTGACCAGAGTGATCGTGGAGGCCGGAGACGTTTCTGTGGCTAG<br>AGCTAAACAAGTGTGGAGAACACTTAA |
